# Supplementary material for: Versatile small molecule kinase assay through real-time, ratiometric fluorescence changes based on a pyrene-DPA-Zn2+ complex
Source: Royal Society of Chemistry journal article supplement (doi:10.1039/d1ra01547h), 2021-01-01
Supplement: d1ra01547h1.pdf [file d1ra01547h1.pdf]

Electronic Supplementary information

***Versatile small molecule kinase assay through real-time, ratiometric  
fluorescence changes based on a pyrene-DPA-Zn<sup>2+</sup> complex***

Jihoon Kim,‡ Jinyoung Oh‡ and Min Su Han\*

Department of Chemistry, Gwangju Institute of Science and Technology (GIST), Gwangju 61005,

Republic of Korea

\* Corresponding author. E-mail: happyhan@gist.ac.kr

## Fluorescence spectra of pyrene-DPA-Zn<sup>2+</sup> complex with ATP and ADP each

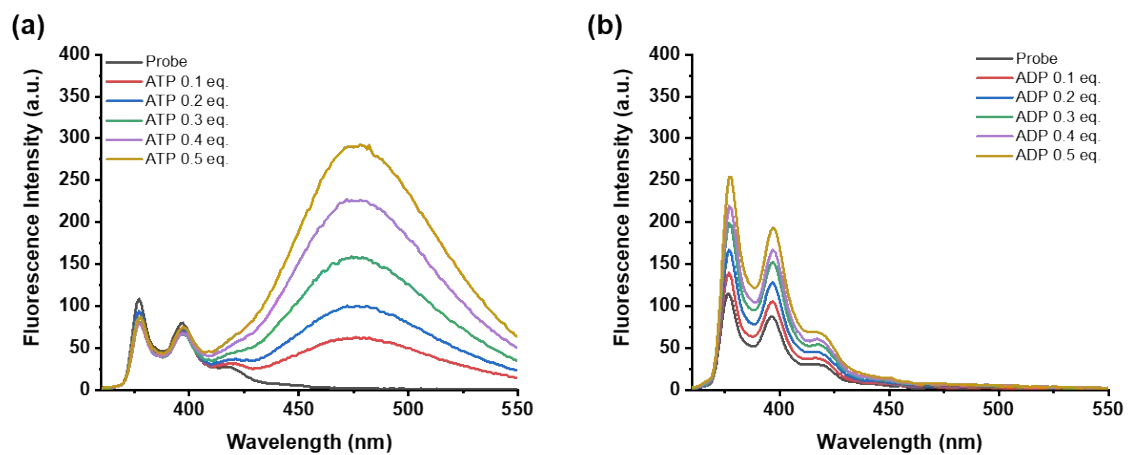

**Fig. S1** Fluorescence spectra of pyrene-DPA-Zn<sup>2+</sup> complex with various equivalents of (a) ATP and (b) ADP in buffer solution (HEPES, 20 mM, pH 7.4). [pyrene-DPA-Zn<sup>2+</sup> complex] = 20  $\mu$ M, [ATP] or [ADP] = 0, 2, 4, 6, 8, 10  $\mu$ M,  $\lambda_{\text{exc}}$  = 341 nm.

## Fluorescence spectra change of pyrene-DPA-Zn<sup>2+</sup> complex by hexokinase

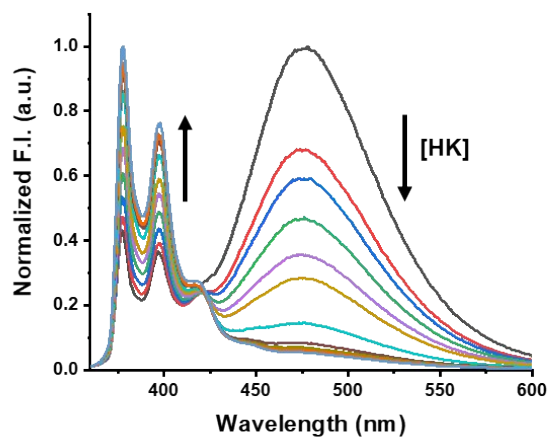

**Fig. S2** Fluorescence spectra of pyrene-DPA-Zn<sup>2+</sup> complex with various units of hexokinase in buffer solution (HEPES, 20 mM, pH 7.4) containing ATP, Mg<sup>2+</sup>, and glucose. [pyrene-DPA-Zn<sup>2+</sup> complex] = 20  $\mu$ M, [ATP] = 10  $\mu$ M, [Mg<sup>2+</sup>] = 80  $\mu$ M, [glucose] = 1 mM, [hexokinase] = 0, 0.1, 0.2, 0.3, 0.4, 0.5, 0.6, 0.7, 0.8, 0.9, 1.0 units,  $\lambda_{ex}$  = 341 nm.

## Enzymatic parameters of hexokinase

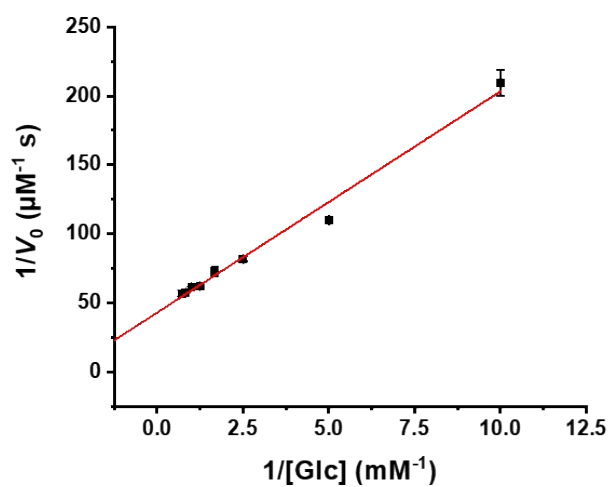

**Fig. S3** Lineweaver–Burk plots for activity of hexokinase *versus* concentration of glucose obtained from ratiometric fluorescence changes by pyrene-DPA-Zn<sup>2+</sup> probe.

**Table S1** Enzymatic parameters obtained from our method and conventional method.

| Method                 | Substrate | $K_m$ (mM) | $V_{max}$ ( $\mu\text{mol min}^{-1} \text{mg}^{-1}$ ) |
|------------------------|-----------|------------|-------------------------------------------------------|
| This study             | Glucose   | 0.367      | 0.665                                                 |
| Reported <sup>S1</sup> | Glucose   | 0.12       | 0.730                                                 |

## Fluorescence spectra change of pyrene-DPA-Zn<sup>2+</sup> complex by creatine kinase

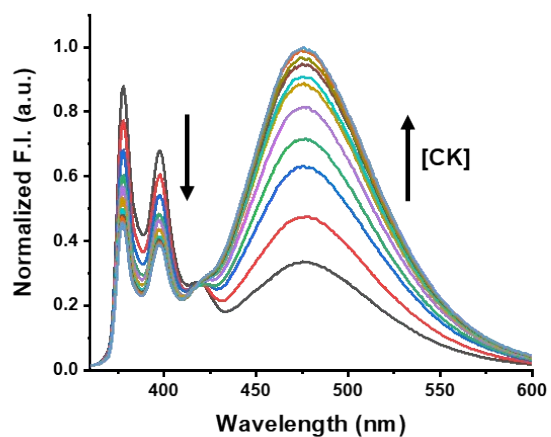

**Fig. S4** Fluorescence spectra of pyrene-DPA-Zn<sup>2+</sup> complex with various units of creatine kinase in buffer solution (HEPES, 20 mM, pH 7.4) containing ADP, Mg<sup>2+</sup> and phosphocreatine. [pyrene-DPA-Zn<sup>2+</sup> complex] = 20  $\mu$ M, [ADP] = 10  $\mu$ M, [Mg<sup>2+</sup>] = 80  $\mu$ M, [phosphocreatine] = 0.75 mM, [creatine kinase] = 0, 0.1, 0.2, 0.3, 0.4, 0.5, 0.6, 0.7, 0.8, 0.9, 1.0 units,  $\lambda_{\text{exc}}$  = 341 nm.

## Estimated Inhibition constant for hexokinase and creatine kinase by the developed system

**Table S2** Inhibition constant of N-benzoyl-D-glucosamine (NBG) for HK and iodoacetamide (IAA) for CK.

| Inhibitor | IC <sub>50</sub> (mM) | IC <sub>50</sub> (mM) from ref <sup>S2</sup> |
|-----------|-----------------------|----------------------------------------------|
| NBG       | 1.59                  | 7.00                                         |
| IAA       | 0.04                  | 0.03                                         |

## Reference

- [S1] (a) N. J. Berthels, R. R. C. Otero, F. F. Bauer, I. S. Pretorius, and J. M. Thevelein, *Appl Microbiol Biotechnol*, 2008, **77**, 1083.  
[S2] (a) M. Willson, I. Alric, J. Perie and Y. H. Sanejouand, *J. Enzyme Inhibition*, 1997, **12**, 101; (b) C. J. Xu, W. E. Klunk, J. N. Kanfer, Q. Xiong, G. Miller and J. W. Pettegrew, *J. Biol. Chem.*, 1996, **271**, 13435.

## Compound characterization

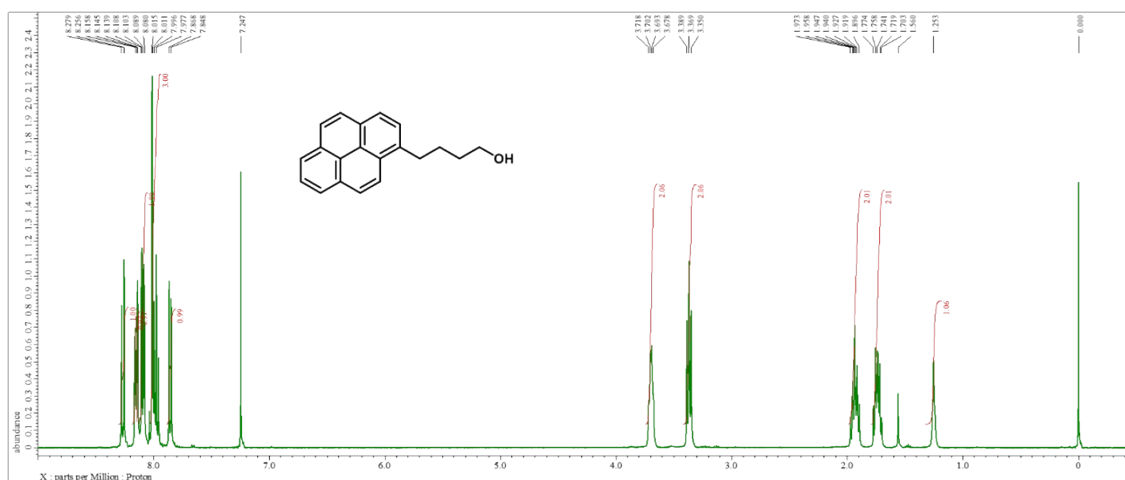

Fig. S4  $^1\text{H-NMR}$  of 1-pyrenebutanol, compound **1** in  $\text{CDCl}_3$ .

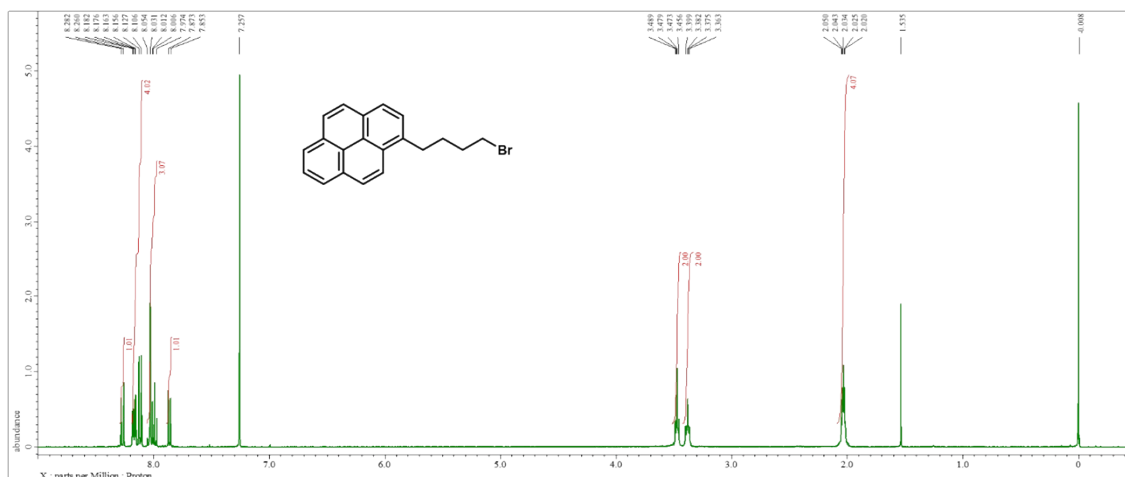

Fig. S5  $^1\text{H-NMR}$  of 1-(4-bromobutyl)pyrene, compound **2** in  $\text{CDCl}_3$ .

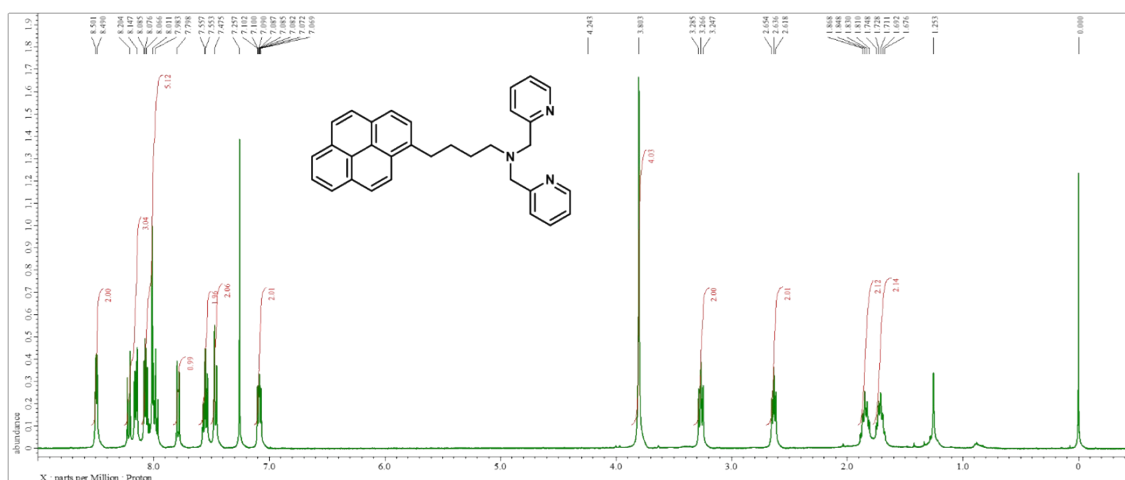

Fig. S6  $^1\text{H-NMR}$  of [(2,2'-dipicolylamino)methyl]pyrene, compound **3** in  $\text{CDCl}_3$ .
